# Supplementary material for: Changes in Oxidised Phospholipids in Response to Oxidative Stress in Microtubule-Associated Protein Tau (MAPT) Mutant Dopamine Neurons
Source: MDPI journal article supplement (doi:10.3390/antiox13050508), 2024-04-24
Supplement: s1 [file s1]

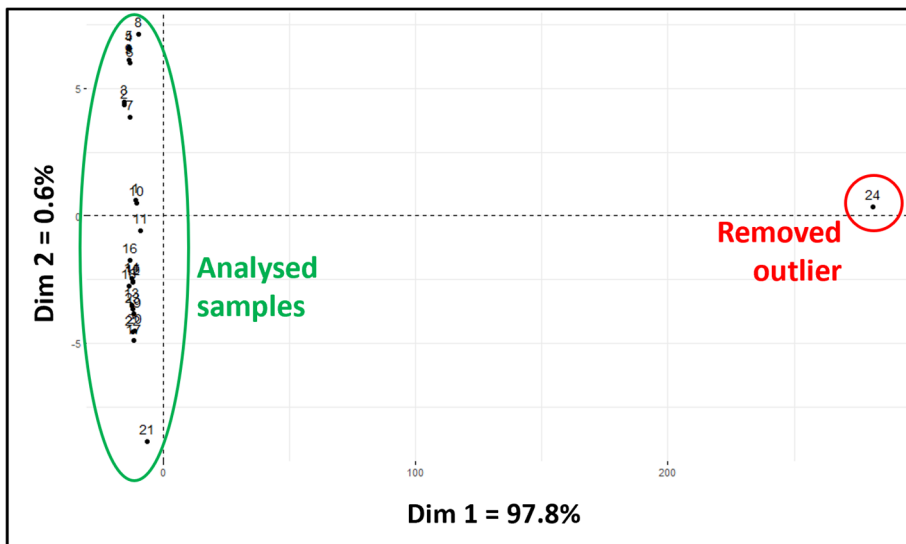

Supplemetanl Figure 1 PCA scores plot from initial analysis showing one sample accounting for 97.8% of total variance within the dataset (point was subsequently removed as an outlier).
